# Supplementary material for: Prior exposure to weathered oil influences foraging of an ecologically important saltmarsh resident fish
Source: PeerJ journal article supplement (doi:10.7717/peerj.12593), 2022-01-05

A

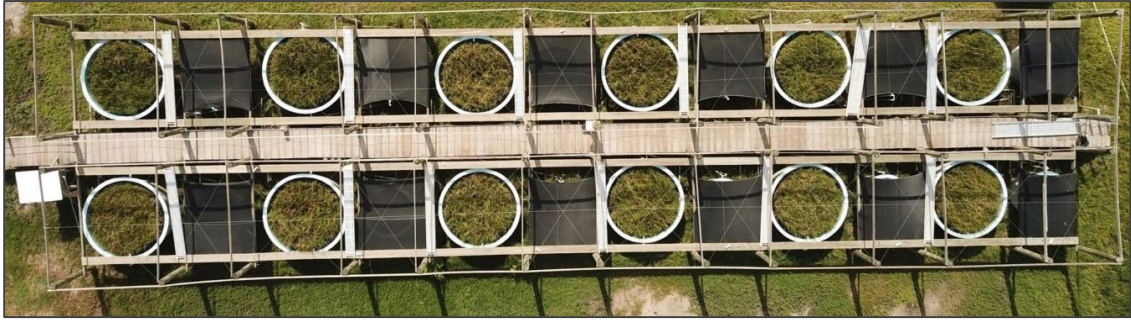

**Treatments**

- No oil
- Low oil
- Medium oil
- High oil

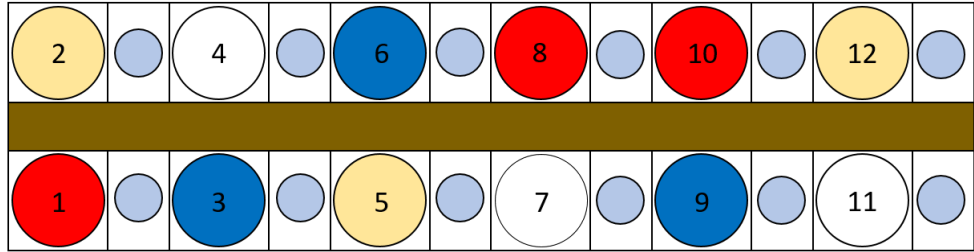

B

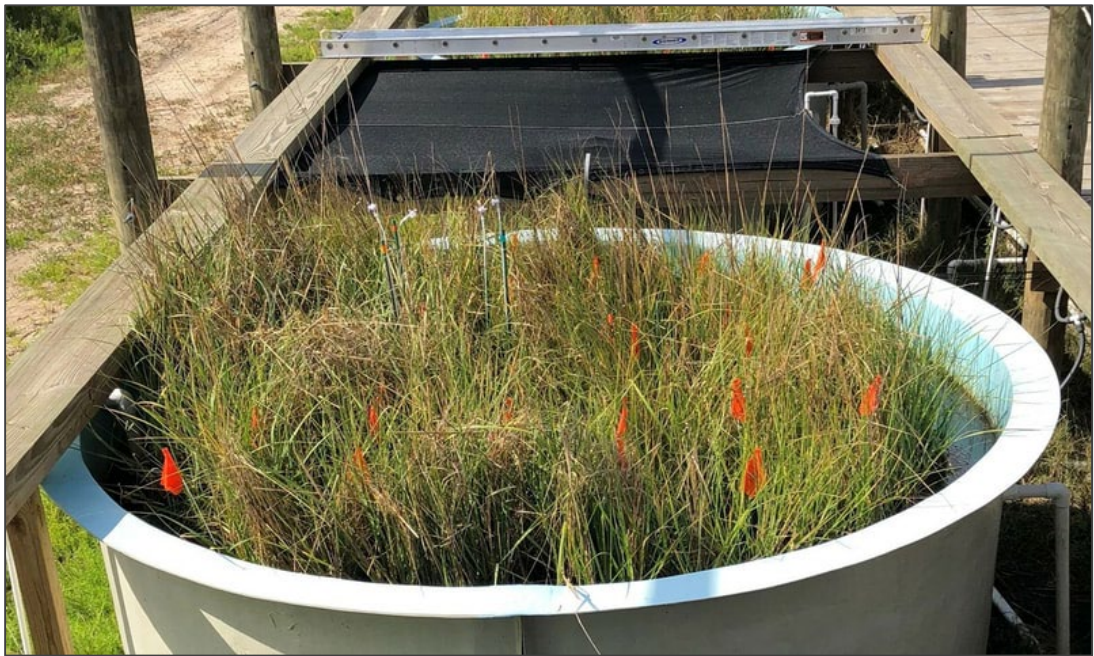

Supplement: McDonald_et_al_FigureS1.pdf [file McDonald_et_al_FigureS1.pdf]
