# Supplementary material for: Prior exposure to weathered oil influences foraging of an ecologically important saltmarsh resident fish
Source: PeerJ. 2022 Jan 5;10:e12593. doi: 10.7717/peerj.12593 (PMC8742545; doi:10.7717/peerj.12593)
Supplement: Supplemental Information 1 [file peerj-10-12593-s001.xlsx]

## Sheet: Sheet1
Bucket_number	Treatment	Treatment_replicate	fish_1_length	fish_1_mortality	Fish_1_foraging_time_elapsed	fish_2_length	fish_2_mortality	fish_2_foraging_time_elapsed	total_shrimp_given	no._gravid_given	shrimp_remain_total	shrimp_remain_gravid	Combined_ foraging_time_elapsed
1	Moderate	1	90	0	1255	75	0	1255	20	3	13	1	2510
2	Low	1	65	0	1255	96	0	1255	20	1	11	0	2510
3	Moderate	2	78	0	1255	95	0	1255	20	0	2	0	2510
4	High	1	85	0	1255	70	0	1255	20	0	15	0	2510
5	Low	2	79	0	1255	80	0	1255	20	2	12	1	2510
6	Autogenic Control	1							20	5	20	5
7	Control	1	98	0	1255	51	0	1255	20	3	11	0	2510
8	Control	2	63	0	1255	80	0	1255	20	6	11	0	2510
9	High	2	100	0	1255	76	0	1255	20	0	15	0	2510
10	Autogenic Control	2							20	9	20	9
11	Control	3	83	0	1255	78	1	1255	20	4	12	1	2510
12	Moderate	3	81	0	1255	59	0	1255	20	2	11	1	2510
13	Low	3	95	0	1255	92	0	1255	20	4	10	2	2510
14	Low	4	74	0	1255	84	0	1255	20	3	7	2	2510
15	Autogenic Control	3							20	4	19	4
16	High	3	63	0	1255	78	1	1255	20	2	20	2	2510
17	Low	5	94	0	1255	90	0	1255	20	6	12	3	2510
18	Moderate	4	78	0	1255	58	0	1255	20	3	17	2	2510
19	High	4	90	0	1255	86	0	1255	20	4	17	2	2510
20	Control	4	83	0	1255	57	0	1255	20	2	14	1	2510
21	Low	6	64	0	1255	64	0	1255	20	4	12	3	2510
22	Moderate	5	95	0	1255	71	1	1255	20	3	15	2	2510
23	Autogenic Control	4							20	4	20	4
24	Control	5	65	0	1255	74	0	1255	20	3	11	2	2510
25	Low	7	87	0	1255	85	0	1255	20	2	11	1	2510
26	Moderate	6	98	1	865	96	1	865	20	0	17	0	1730
27	High	5	84	0	1255	64	0	1255	20	4	15	2	2510
28	Control	6	105	0	1255	55	0	1255	20	3	11	2	2510
29	Moderate	7	84	0	1053	86	0	1053	20	0	0	0	2106
30	Control	7	90	0	1255	46	0	1255	20	0	9	0	2510
31	Control	8	96	0	1255	75	0	1255	20	1	3	0	2510
32	Moderate	8	93	0	1255	62	0	1255	20	0	15	0	2510
33	Low	8	68	0	1255	65	0	1255	20	1	12	1	2510
34	Moderate	9	103	0	1255	81	1	0	20	4	15	2	1255
35	Control	9	102	0	1255	80	0	1255	20	2	11	0	2510
36	Low	9	66	0	1255	75	0	1255	20	6	11	6	2510
